# Supplementary material for: Resveratrol reverses the adverse effects of a diet-induced obese murine model on oocyte quality and zona pellucida softening
Source: Royal Society of Chemistry journal article supplement (doi:10.1039/c8fo00149a), 2018-01-01
Supplement: c8fo00149a1.pdf [file c8fo00149a1.pdf]

Supplementary Materials

**Resveratrol reverses the adverse effects of diet-induced obese murine model on oocyte quality and zona pellucida softening**

Zhenzhen Jia<sup>a,1</sup>, Zeyang Feng<sup>b,1</sup>, Lining Wang<sup>a</sup>, Hao Li<sup>c</sup>, Hongyu Wang<sup>a</sup>, Dingqi

Xu<sup>a</sup>, Xin Zhao<sup>b,\*</sup>, Daofu Feng<sup>d,\*</sup>, Xizeng Feng<sup>a,\*</sup>

<sup>a</sup> State Key Laboratory of Medicinal Chemical Biology, The Key Laboratory of Bioactive Materials, Ministry of Education, College of Life Science, Nankai University, Tianjin 300071, China.

<sup>b</sup> The Institute of Robotics and Automatic Information Systems, Nankai University, Tianjin 300071, China

<sup>c</sup> School of Medicine, Nankai University, Tianjin 300071, China

<sup>d</sup> Department of General Surgery, Tianjin Medical University General Hospital, No. 154 Anshan Road, Tianjin 300052, China

**Table of Contents:**

1. Table S1. Composition of the high-fat diet

2. Video S1-4. Magnetic resonance imaging of mice

Video S1. Coronal plane magnetic resonance imaging of lean mice

Video S2. Horizontal plane magnetic resonance imaging of lean mice

Video S3. Coronal plane magnetic resonance imaging of obese mice

Video S4. Horizontal plane magnetic resonance imaging of obese mice

1. Table S1. Composition of the high-fat diet

| Component         | HF % (w/w) |
|-------------------|------------|
| Fat               | 15         |
| Sucrose           | 15         |
| Yolk powder       | 10         |
| Whole milk powder | 1          |
| Mixed salt        | 1          |
| Mixed vitamin     | 0.1        |
| Basal feed        | 57.9       |
